# Supplementary material for: SNCAGene, but NotMAPT, Influences Onset Age of Parkinson’s Disease in Chinese and Australians
Source: Hindawi journal article supplement (doi:10.1155/2015/135674), 2015-01-01

# Independent and joint effects of the *MAPT* and *SNCA* genes on onset age of Parkinson's disease

Yue Huang<sup>1\*</sup>, Gang Wang<sup>2\*</sup>, Dominic Rowe<sup>3</sup>, Ying Wang<sup>2</sup>, John BJ Kwok<sup>1</sup>, Qin Xiao<sup>2</sup>, Frank Mastaglia<sup>4</sup>, Jun Liu<sup>2</sup>, Sheng-Di Chen<sup>2#</sup>, Glenda Halliday<sup>1#</sup>

**Supplementary Table 1** Primers Sequences and Genotyping Methods

| Gene        | SNP        | Chromosome position | Primers                                                 | Genotyping methods                                                                     | PCR products (bp) | RFLP Products (bp)                  |
|-------------|------------|---------------------|---------------------------------------------------------|----------------------------------------------------------------------------------------|-------------------|-------------------------------------|
| <i>SNCA</i> | D4S3481    | ~10 kb upstream     | F: CCTGGCATATTTGATTGCAA<br>R: GACTGGCCCAAGATTAACCA      | Capillary electrophoresis on an ABI 3100 Genetic Analyzer (Applied Biosystems)         | 259, 261, 263     | NA                                  |
|             | rs11931074 | 90639515            | F: ACCTATCTATTCCGCCCATCC<br>R: TAGCCAAATCTATAAGAGCAACAC | Bsrl (invitrogen)                                                                      | 351               | T allele: 351<br>G allele: 203, 148 |
|             | rs894278   | 90734535            | F: GACGGAAGTGAAGGCAGTG<br>R: GGAAGGAGGGCAGAGTTTT        | Direct DNA sequencing ( 3730xl DNA analyser, Applied Biosystems, Foster City, CA, USA) | 399               | NA                                  |
| <i>MAPT</i> | rs3744456  | 43972176            | F: GGTGCGTCTTCCAGGGGACA<br>R: GCGAATCTGGTGGTGAAGAC      | Direct DNA sequencing (3730xl DNA analyser, Applied Biosystems, Foster City, CA, USA)  | 1247              | NA                                  |
|             | rs242557   | 44019712            | F: GACACTAATAAGGGAAAATCTC<br>R: GACTGTGGAAGGCTCTGA      | APaI (invitrogen)                                                                      | 405               | A allele: 405<br>G allele: 236, 169 |
|             | rs17650901 | 44039691            | F: CAACACTCCTCAGAACTTATC<br>R: CAGTGATCTGGGCCTGCTGTG    | AluI (New England Biolabs Inc.)                                                        | 229               | A allele: 229<br>G allele: 183, 46  |

NA=not applicable

Supplementary Figure: **No** gender difference on the *SNCA* genetic effects of the onset age in PD

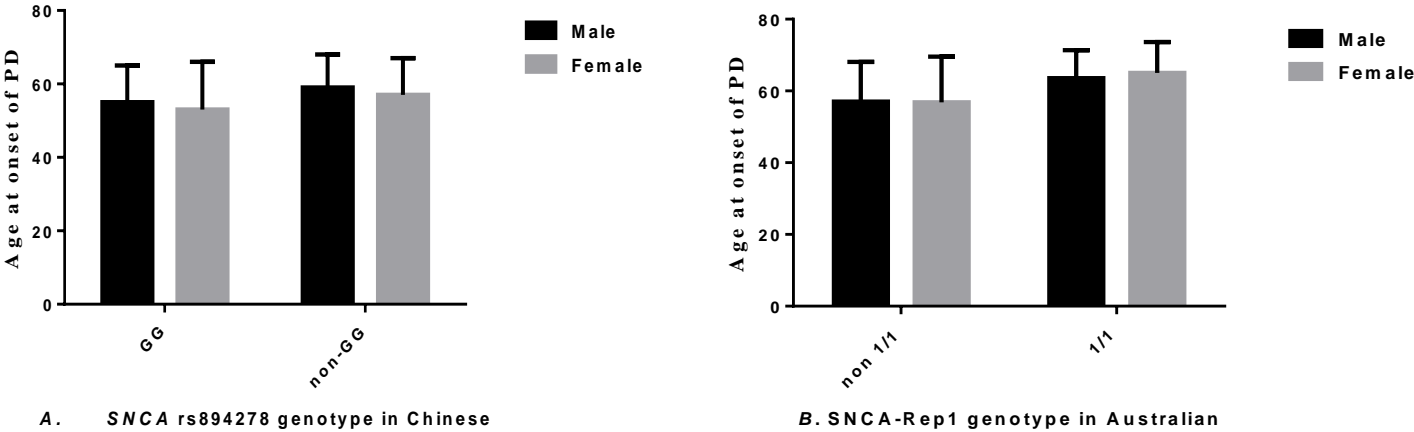

Supplement: f1 [file 135674.f1.pdf]
